# Supplementary material
Source: Copernicus journal article supplement (doi:10.5194/nhess-26-2765-2026)
Supplement: Supplementary file 1 [file nhess-26-2765-2026-supplement.pdf]

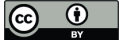

*Supplement of*

## **A high-resolution framework for urban pluvial flood risk mapping**

**Anastasia Vogelbacher et al.**

*Correspondence to:* Anastasia Vogelbacher ([anastasia.vogelbacher@tuhh.de](mailto:anastasia.vogelbacher@tuhh.de))  
and Malte von Szombathely ([malte.szombathely@uni-hamburg.de](mailto:malte.szombathely@uni-hamburg.de))

The copyright of individual parts of the supplement might differ from the article licence.

| <b>Institution and local authorities involved in the stakeholder workshops</b>                                                                                                     | <b>Impact explanation</b>                                                                                                                                   |
|------------------------------------------------------------------------------------------------------------------------------------------------------------------------------------|-------------------------------------------------------------------------------------------------------------------------------------------------------------|
| Scientists working on local adaptation planning and climate risks, geography and urban research                                                                                    | Development of the toolbox, index development and method development.                                                                                       |
| BUKEA                                                                                                                                                                              | Potential beneficiary of the toolbox, consulting regarding input data and methodology, applicability, result plausibility and transferability.              |
| The State Agency for Geoinformation and Surveying provides geoinformation systems and geoportals.                                                                                  | Application of the toolbox in the local data infrastructure. Consulting regarding technical applicability.                                                  |
| Local drinking water supply and wastewater treatment company                                                                                                                       | Consulting in local adaptation and urban planning for rainwater infrastructure adaptation and hazard (rainwater) modelling and plausibility of the results. |
| State Agency for Roads, Bridges, and Waterways responsible for the planning, construction, maintenance, and operation of a large part of the city's transportation infrastructure. | Consulting regarding the input data and usage of the toolbox and plausibility of the results.                                                               |

30 **Table S1:** Overview of local authorities and institutions involved in the development of the pluvial risk map.

|    | OBJECTID * | Shape * | ID | WR | C | ES | EDQ | Floors | Building type | StatisticalUnit |
|----|------------|---------|----|----|---|----|-----|--------|---------------|-----------------|
| 1  | 1          | Polygon | 1  | 1  | 1 | 0  | 0   | 1      | 1             | 1               |
| 2  | 2          | Polygon | 2  | 1  | 1 | 0  | 0   | 1      | 1             | 1               |
| 3  | 3          | Polygon | 3  | 2  | 2 | 1  | 1   | 2      | 1             | 1               |
| 4  | 4          | Polygon | 4  | 0  | 1 | 1  | 0   | 2      | 2             | 1               |
| 5  | 5          | Polygon | 5  | 1  | 1 | 1  | 0   | 1      | 1             | 1               |
| 6  | 6          | Polygon | 6  | 1  | 1 | 1  | 0   | 1      | 1             | 1               |
| 7  | 7          | Polygon | 7  | 4  | 3 | 2  | 1   | 2      | 1             | 1               |
| 8  | 8          | Polygon | 8  | 1  | 0 | 0  | 0   | 1      | 1             | 1               |
| 9  | 9          | Polygon | 9  | 2  | 0 | 1  | 0   | 1      | 1             | 1               |
| 10 | 10         | Polygon | 10 | 0  | 0 | 1  | 0   | 2      | 1             | 1               |

35 **Figure S1: Excerpt of input data attribute-table.** The screenshot contains the first ten (of 37) rows of the example ArcGIS-layer used for the analysis. WR reflects the welfare recipients, C the Children younger 10 years old, ES the elderly singles above 65 years old, EDQ represents the educational level. A value of one represents one resident leaving school within the past three years without a high school diploma. Floors reflect the number of floors per building and Building type the usage of solely living use (1) or mixed use (2), created using ArcGIS Pro (ESRI, 2023).

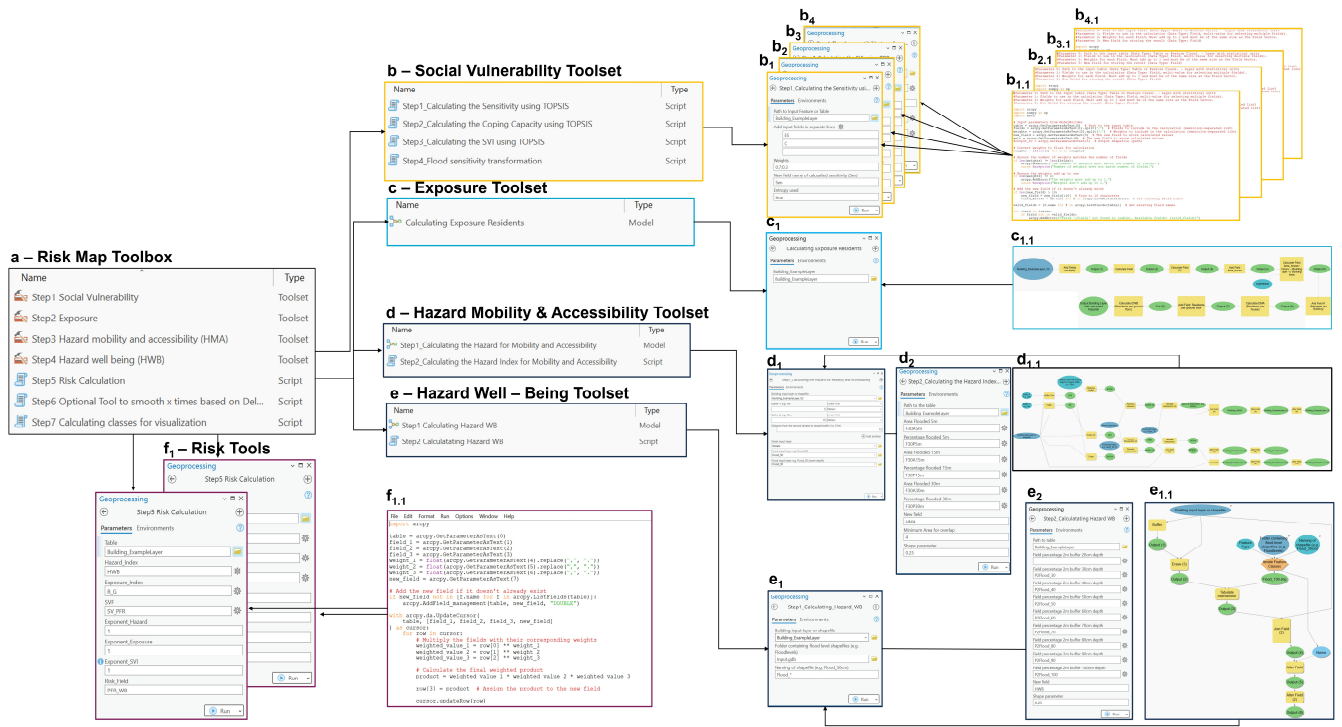

**Figure S2: Outline of the Risk Map Toolbox.** The coloured borders represent the corresponding risk parameters (Social Vulnerability, Exposure, Hazard). (a) shows the first level of the toolbox whereas (b) to (f) corresponds to toolsets within the toolbox. (b1) to (b4) (c1 to e1 respectively) represent the user interface of the individual toolsets. b1.1 to f.1.1 correspond to the underlying python scripts and model builder toolsets, running in the background of each tool. Tools developed using ArcGIS Pro (ESRI, 2023) and Python (Python Software Foundation, 2026)

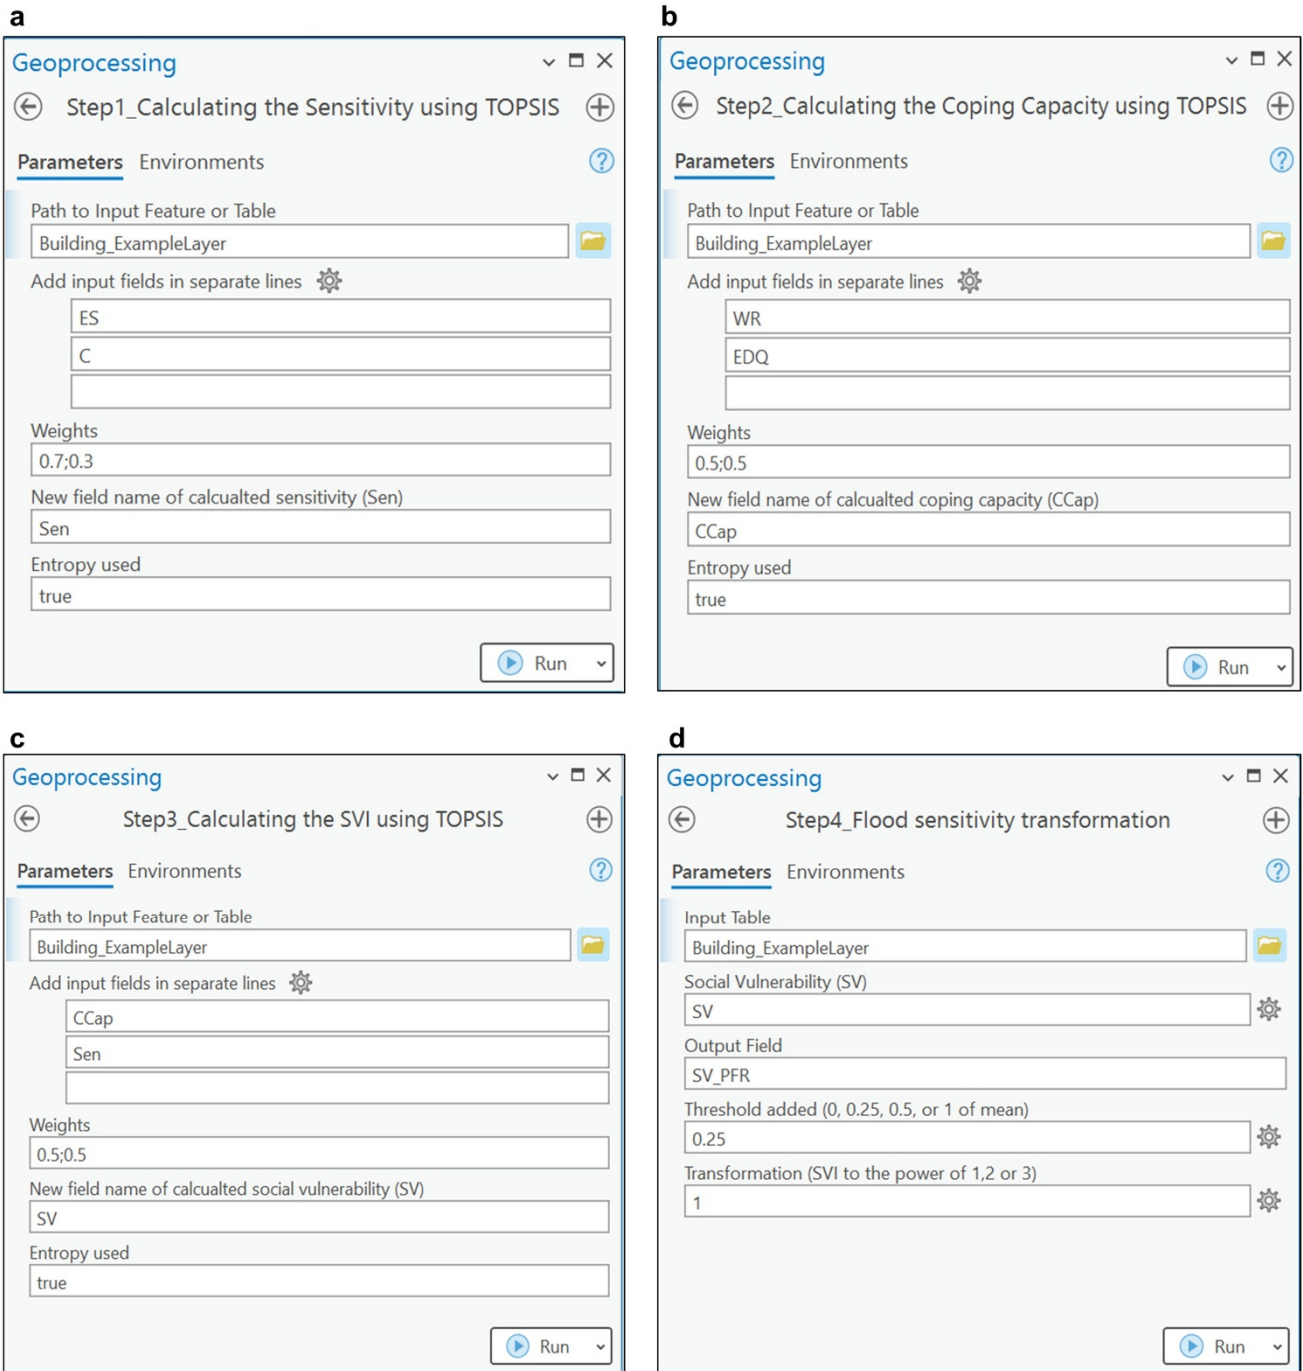

50 **Figure S3: Social Vulnerability Tools.** (a) shows the tool used for the calculation of sensitivity using the example layer as input. (b) shows the second tool used for the estimation of coping capacity, whereas (c) depict the calculator of the social vulnerability variable (SV) and its transformation to the final SV index to pluvial flood risk ( $SV_{PFR}$ ), created using ArcGIS Pro (ESRI, 2023).

|    | OBJECTID * ▲ | Shape * | ID | WR | C | ES | EDQ | Floors | Building type | StatisticalUnit | Residents | LivingArea | Area_house | Sen  | CCap | SV   | SV_PF |
|----|--------------|---------|----|----|---|----|-----|--------|---------------|-----------------|-----------|------------|------------|------|------|------|-------|
| 1  | 1            | Polygon | 1  | 1  | 1 | 0  | 0   | 1      | 1             | 1               | 250       | 9000       | 221,78     | 0,25 | 0,33 | 0,29 | 0,18  |
| 2  | 2            | Polygon | 2  | 1  | 1 | 0  | 0   | 1      | 1             | 1               | 250       | 9000       | 214,24     | 0,25 | 0,33 | 0,29 | 0,18  |
| 3  | 3            | Polygon | 3  | 2  | 2 | 1  | 1   | 2      | 1             | 1               | 250       | 9000       | 359,24     | 0,55 | 0,75 | 0,63 | 0,59  |
| 4  | 4            | Polygon | 4  | 0  | 1 | 1  | 0   | 2      | 2             | 1               | 250       | 9000       | 372,77     | 0,58 | 0    | 0,64 | 0,6   |
| 5  | 5            | Polygon | 5  | 1  | 1 | 1  | 0   | 1      | 1             | 1               | 250       | 9000       | 209,23     | 0,58 | 0,33 | 0,44 | 0,33  |
| 6  | 6            | Polygon | 6  | 1  | 1 | 1  | 0   | 1      | 1             | 1               | 250       | 9000       | 250,03     | 0,58 | 0,33 | 0,44 | 0,33  |
| 7  | 7            | Polygon | 7  | 4  | 3 | 2  | 1   | 2      | 1             | 1               | 250       | 9000       | 667,58     | 1,11 | 1    | 0,99 | 1,27  |
| 8  | 8            | Polygon | 8  | 1  | 0 | 0  | 0   | 1      | 1             | 1               | 250       | 9000       | 209,23     | 0    | 0,33 | 0,43 | 0,32  |
| 9  | 9            | Polygon | 9  | 2  | 0 | 1  | 0   | 1      | 1             | 1               | 250       | 9000       | 300,29     | 0,86 | 0,61 | 0,69 | 0,68  |
| 10 | 10           | Polygon | 10 | 0  | 0 | 1  | 0   | 2      | 1             | 1               | 250       | 9000       | 285,75     | 0,86 | 0    | 0,85 | 0,98  |

55

**Figure S4: Attribute table of the example data table after implementing the Social Vulnerability Toolset.** Sensitivity (Sen) and Coping Capacity (CCap) are derived from the input fields welfare recipients (WR), children younger 10 years old(C), elderly singles older 65 years old (ES) and people within a house leaving school within the past three years without high school diploma (EDQ). Columns “Statistical Unit”, “Residents” and “Living Area” are obtained from the statistical unit (city sub-level) information and attributed to the building dataset, created using ArcGIS Pro (ESRI, 2023).

60

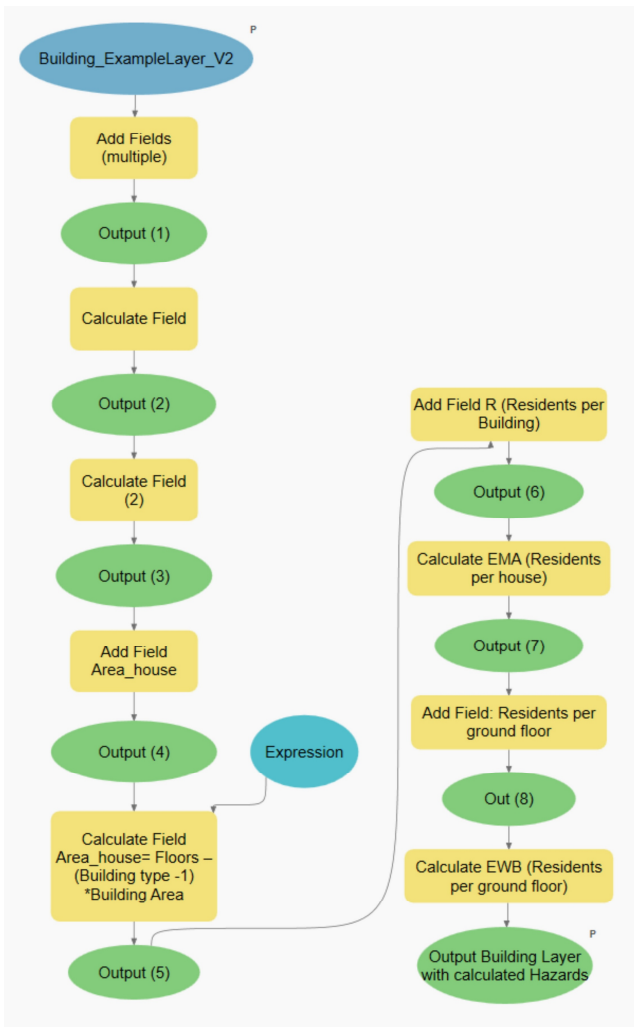

**Figure S5: Complete workflow of the Exposure tool.** Parameters (P) allow the user to set the input and output settings. Yellow boxes depict calculation steps whereas green boxes depict intermediate results, created using ArcGIS Pro (ESRI, 2023). The expression box is used to set the input formula for the calculation of the buildings area, (as shown in Eq. 8).

65

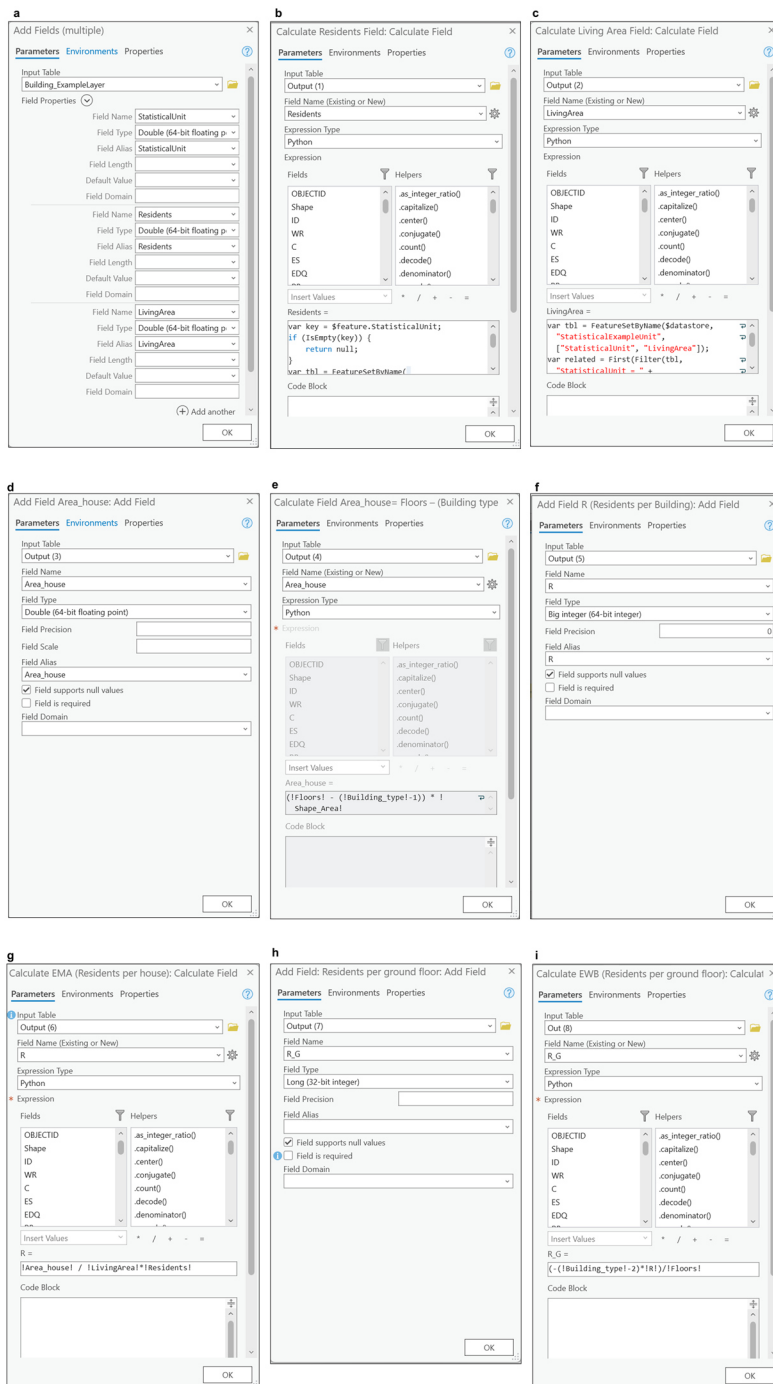

70 **Figure S6: Exposure tool.** This graphic depicts the underlying tools of the exposure tool including the combination of statistical unit information with building data (a to c), the estimation of the building area and residents per building (d to f) and the corresponding estimation of exposure index relative to well-being (g) and mobility and accessibility (h,i), created using ArcGIS Pro (ESRI, 2023).

|    | OBJECTID * | Shape * | ID | WR | C | ES | EDQ | Floors | Building type | StatisticalUnit | Residents | LivingArea | Area_house | EMA | EWB |
|----|------------|---------|----|----|---|----|-----|--------|---------------|-----------------|-----------|------------|------------|-----|-----|
| 1  | 1          | Polygon | 1  | 1  | 1 | 0  | 0   | 1      | 1             | 1               | 250       | 9000       | 221,78     | 5   | 5   |
| 2  | 2          | Polygon | 2  | 1  | 1 | 0  | 0   | 1      | 1             | 1               | 250       | 9000       | 214,24     | 5   | 5   |
| 3  | 3          | Polygon | 3  | 2  | 2 | 1  | 1   | 2      | 1             | 1               | 250       | 9000       | 359,24     | 10  | 5   |
| 4  | 4          | Polygon | 4  | 0  | 1 | 1  | 0   | 2      | 2             | 1               | 250       | 9000       | 372,77     | 8   | 0   |
| 5  | 5          | Polygon | 5  | 1  | 1 | 1  | 0   | 1      | 1             | 1               | 250       | 9000       | 209,23     | 5   | 5   |
| 6  | 6          | Polygon | 6  | 1  | 1 | 1  | 0   | 1      | 1             | 1               | 250       | 9000       | 250,03     | 6   | 6   |
| 7  | 7          | Polygon | 7  | 4  | 3 | 2  | 1   | 2      | 1             | 1               | 250       | 9000       | 667,58     | 20  | 10  |
| 8  | 8          | Polygon | 8  | 1  | 0 | 0  | 0   | 1      | 1             | 1               | 250       | 9000       | 209,23     | 5   | 5   |
| 9  | 9          | Polygon | 9  | 2  | 0 | 1  | 0   | 1      | 1             | 1               | 250       | 9000       | 300,29     | 7   | 7   |
| 10 | 10         | Polygon | 10 | 0  | 0 | 1  | 0   | 2      | 1             | 1               | 250       | 9000       | 285,75     | 6   | 3   |

75

**Figure S7: Attribute table of the example data table after implementing the Exposure Toolset.** Welfare recipients (WR), children younger 10 years old(C), elderly singles older 65 years old (ES) and people within a house leaving school within the past three years without a high school diploma (EDQ). Columns “Statistical Unit”, “Residents” and “Living Area” are obtained from the statistical unit (city sub-level) information and attributed to the building dataset. Residents per building (R) correspond to  $E_{MA}$  and Residents per ground floor (R\_G) correspond to  $E_{WB}$  within the presented framework, created using ArcGIS Pro (ESRI, 2023).

80

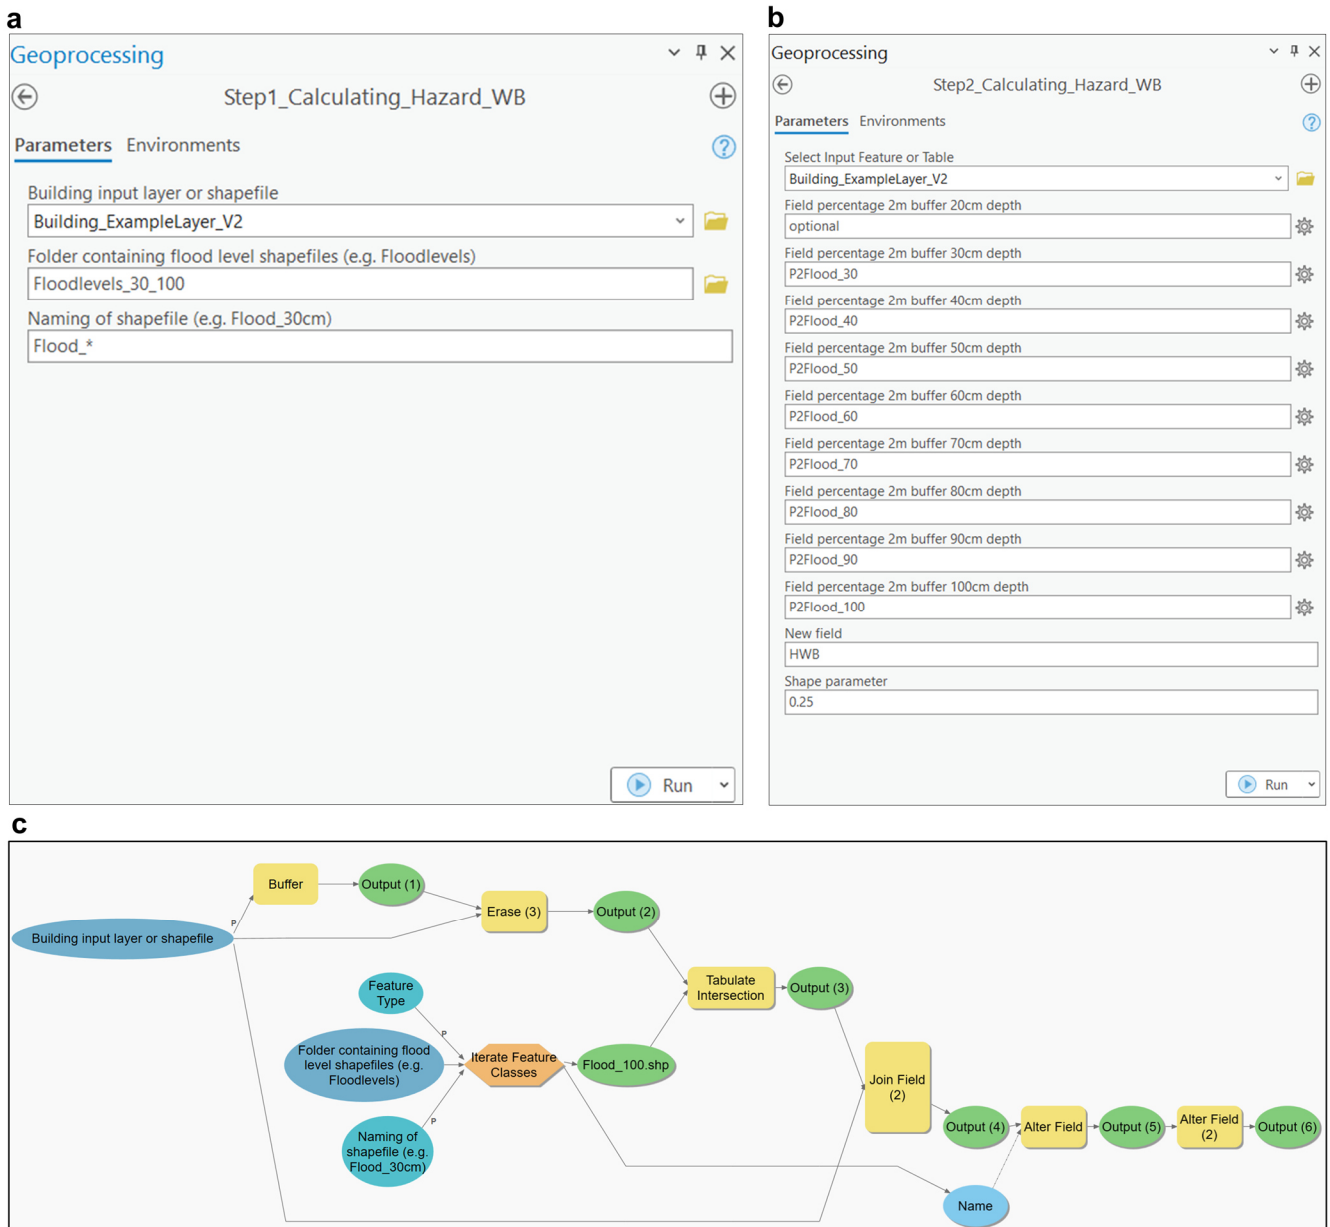

85 **Figure S8: Toolset to calculate the hazard index related to well-being.** (a) shows the first tool, used to calculate the intersected areas between flood layers and affected buildings. (b) shows the second tool used to calculate the resulting hazard value ( $H_{WB}$ ). (c) depicts the corresponding workflow behind the first tool (Step 1), created using ArcGIS Pro (ESRI, 2023).

| A2Flood_30 | P2Flood_30 | A2Flood_40 | P2Flood_40 | A2Flood_50 | P2Flood_50 | A2Flood_60 | P2Flood_60 | A2Flood_70 | P2Flood_70 | A2Flood_80 | P2Flood_80 | A2Flood_90 | P2Flood_90 | A2Flood_100 | P2Flood_100 | HWB  |
|------------|------------|------------|------------|------------|------------|------------|------------|------------|------------|------------|------------|------------|------------|-------------|-------------|------|
| 37.96      | 91.76      | 37.96      | 91.76      | 37.96      | 91.76      | 37.96      | 91.76      | 37.65      | 91         | 36.02      | 87.06      | 21.91      | 52.95      | 3.27        | 7.91        | 7    |
| 26.93      | 78.61      | 15         | 43.78      | 10.68      | 31.17      | 5.95       | 17.36      | 0.39       | 1.14       | 0          | 0          | 0          | 0          | 0           | 0           | 2.87 |
| 0.63       | 2          | 0          | 0          | 0          | 0          | 0          | 0          | 0          | 0          | 0          | 0          | 0          | 0          | 0           | 0           | 0    |
| 12.22      | 17.15      | 5.74       | 8.06       | 0          | 0          | 0          | 0          | 0          | 0          | 0          | 0          | 0          | 0          | 0           | 0           | 0.07 |
| 0          | 0          | 0          | 0          | 0          | 0          | 0          | 0          | 0          | 0          | 0          | 0          | 0          | 0          | 0           | 0           | 0    |
| 0          | 0          | 0          | 0          | 0          | 0          | 0          | 0          | 0          | 0          | 0          | 0          | 0          | 0          | 0           | 0           | 0    |
| 0          | 0          | 0          | 0          | 0          | 0          | 0          | 0          | 0          | 0          | 0          | 0          | 0          | 0          | 0           | 0           | 0    |
| 0          | 0          | 0          | 0          | 0          | 0          | 0          | 0          | 0          | 0          | 0          | 0          | 0          | 0          | 0           | 0           | 0    |
| 0          | 0          | 0          | 0          | 0          | 0          | 0          | 0          | 0          | 0          | 0          | 0          | 0          | 0          | 0           | 0           | 0    |
| 12.64      | 31.67      | 1.68       | 4.22       | 0          | 0          | 0          | 0          | 0          | 0          | 0          | 0          | 0          | 0          | 0           | 0           | 0.83 |

90

**Figure S9: Attribute table of the example data table after implementing the hazard to well-being toolset.** Each column depicts the calculated intersections as area in m<sup>2</sup> (A) and percentage (P) for the corresponding flood depth named in the column-header using a 2 m buffer around the building. The resulting hazard index related to well-being (*H<sub>WB</sub>*) ranges for the first ten rows between 0 and 7, created using ArcGIS Pro (ESRI, 2023). “Null” values represent zero overlapping areas.

95

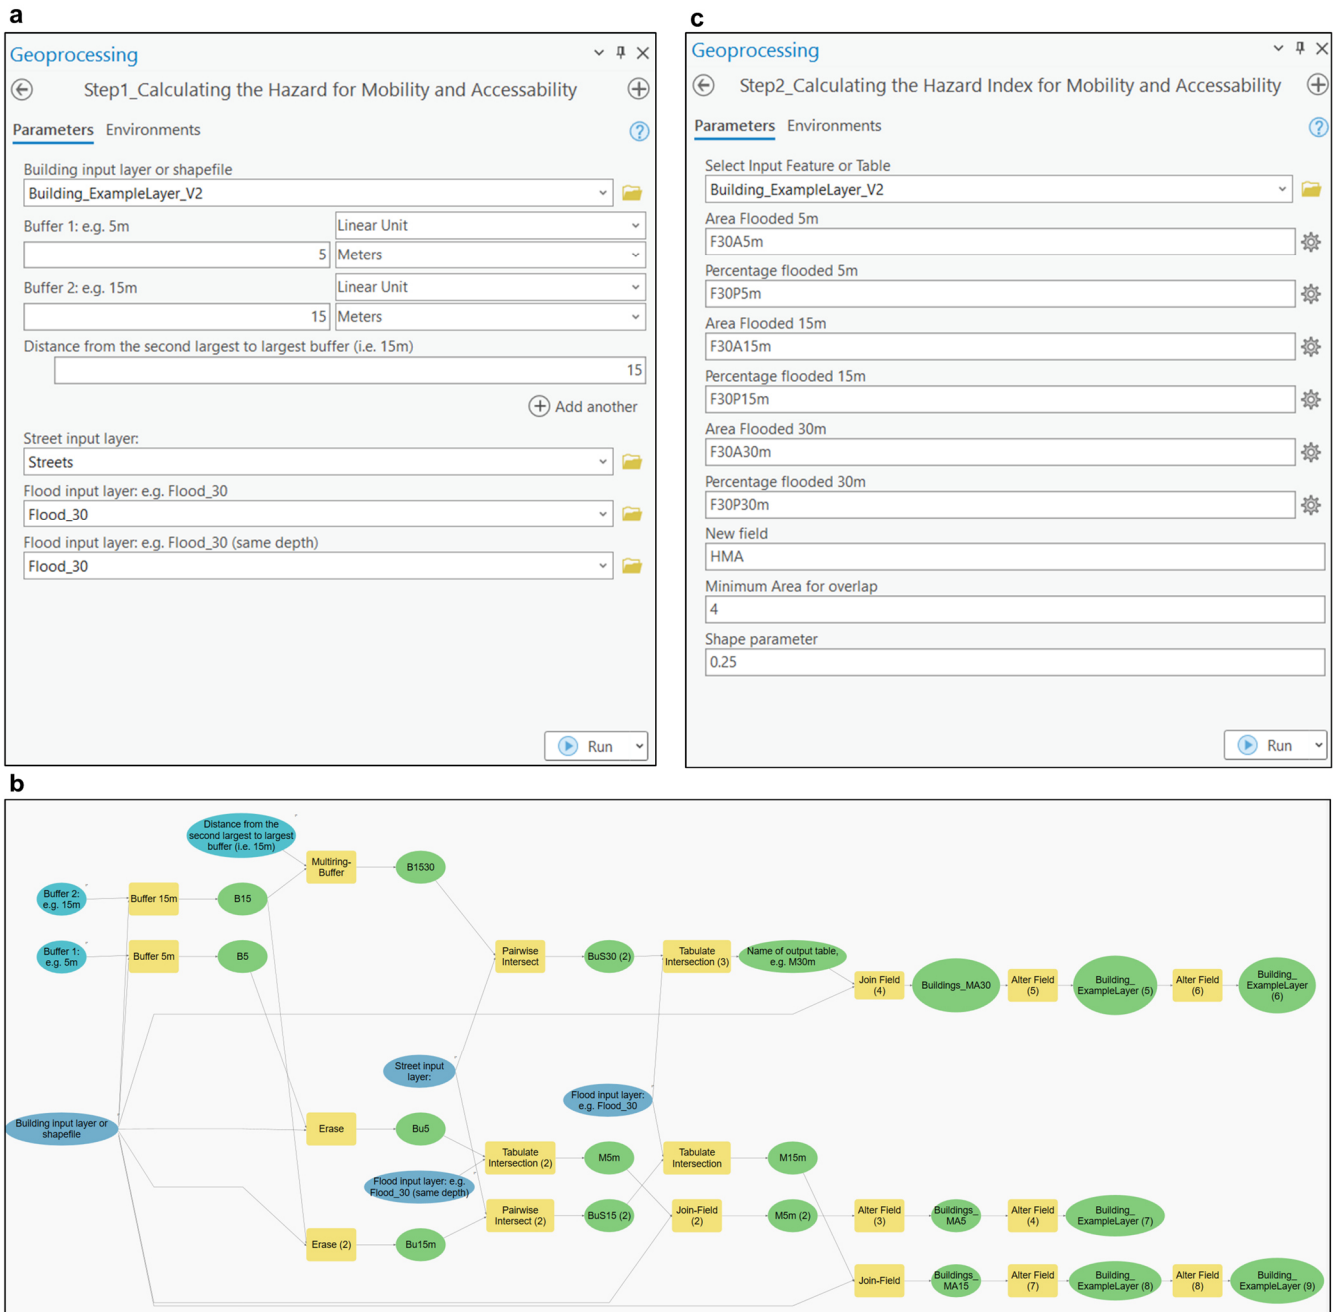

100 **Figure S10: Toolset to calculate the hazard to mobility and accessibility with a 30 cm flood layer.** (a) shows the first tool, used to calculate the intersected areas between flood layer and affected building (streets, respectively). (b) shows the corresponding workflow behind the tool and (c) shows the second tool used to calculate the resulting hazard value ( $H_{MA}$ ). Toolsets created using ArcGIS Pro (ESRI, 2023).

|    | OBJECTID * ▲ | F30A30m | F30P30m | F30A15m | F30P15m | F30A5m | F30P5m | HMA  |
|----|--------------|---------|---------|---------|---------|--------|--------|------|
| 1  | 1            | 7,91    | 7,91    | 7,91    | 7,91    | 7,91   | 7,91   | 1    |
| 2  | 2            | 0       | 0       | 0       | 0       | 0      | 0      | 1    |
| 3  | 3            | 0       | 0       | 0       | 0       | 0      | 0      | 0    |
| 4  | 4            | 0       | 0       | 0       | 0       | 0      | 0      | 0,33 |
| 5  | 5            | 0       | 0       | 0       | 0       | 0      | 0      | 0    |
| 6  | 6            | 0       | 0       | 0       | 0       | 0      | 0      | 1    |
| 7  | 7            | 0       | 0       | 0       | 0       | 0      | 0      | 0,92 |
| 8  | 8            | 0       | 0       | 0       | 0       | 0      | 0      | 0,84 |
| 9  | 9            | 0       | 0       | 0       | 0       | 0      | 0      | 0    |
| 10 | 10           | 0       | 0       | 0       | 0       | 0      | 0      | 0,96 |

105 **Figure S11: Attribute table of the example data table after implementing the Hazard to Mobility and Accessibility Toolset.** F305m depicts the calculated intersections as area in m<sup>2</sup> (A) and percentage (P) for the flood depth of 30cm and a 5m buffer around the building, as well as interesting streets with 15m, and 15-30m buffer around the building. The resulting hazard for mobility and accessibility (*H<sub>MA</sub>*) ranges for the first ten rows between 0 and 1. Created using ArcGIS Pro (ESRI, 2023).

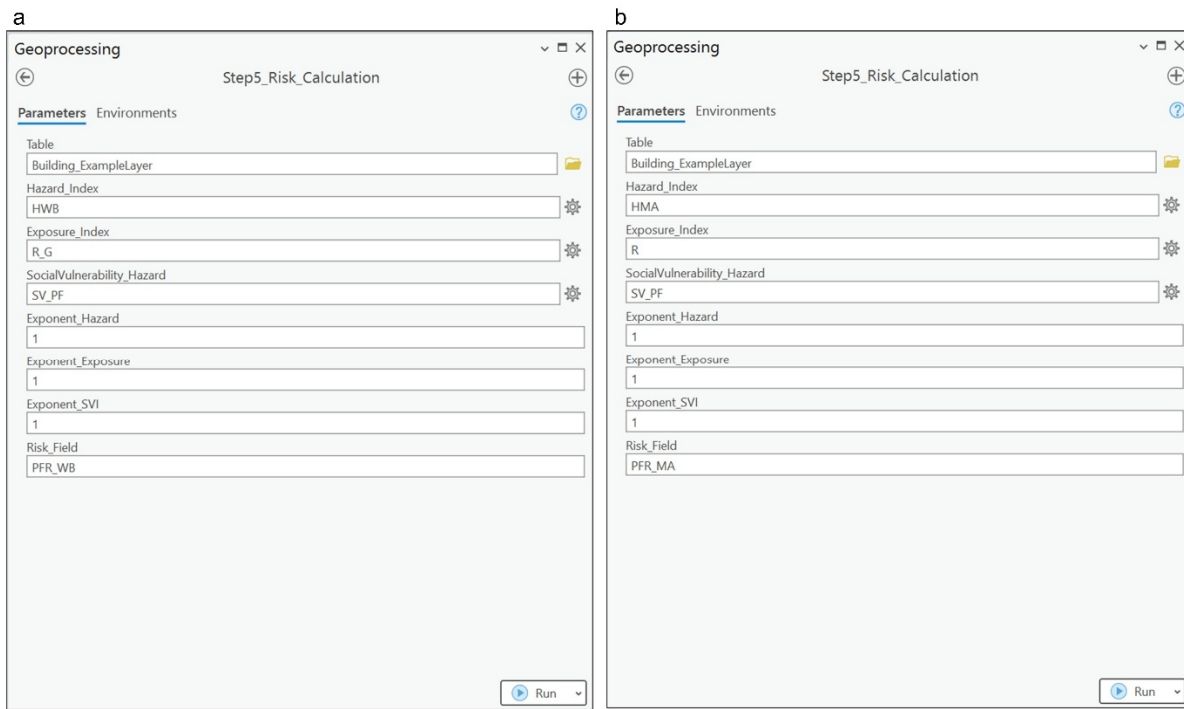

110 **Figure S12: Risk tool within the Pluvial flood risk framework.** To calculate the pluvial flood risk to well-being (a) and to mobility and accessibility (b), created using ArcGIS Pro (ESRI, 2023).

|    | OBJECTID * ^ | Shape * | ID | WR | C | ES | EDQ | Floors | Building type | StatisticalUnit | Residents | LivingArea | Area_house | HWB  | HMA  | PFR_WB | PFR_MA |
|----|--------------|---------|----|----|---|----|-----|--------|---------------|-----------------|-----------|------------|------------|------|------|--------|--------|
| 1  | 1            | Polygon | 1  | 1  | 1 | 0  | 0   | 1      | 1             | 1               | 250       | 9000       | 221,78     | 7    | 1    | 6,16   | 0,88   |
| 2  | 2            | Polygon | 2  | 1  | 1 | 0  | 0   | 1      | 1             | 1               | 250       | 9000       | 214,24     | 2,87 | 1    | 2,53   | 0,88   |
| 3  | 3            | Polygon | 3  | 2  | 2 | 1  | 1   | 2      | 1             | 1               | 250       | 9000       | 359,24     | 0    | 0    | 0      | 0      |
| 4  | 4            | Polygon | 4  | 0  | 1 | 1  | 0   | 2      | 2             | 1               | 250       | 9000       | 372,77     | 0,07 | 0,33 | 0      | 1,58   |
| 5  | 5            | Polygon | 5  | 1  | 1 | 1  | 0   | 1      | 1             | 1               | 250       | 9000       | 209,23     | 0    | 0    | 0      | 0      |
| 6  | 6            | Polygon | 6  | 1  | 1 | 1  | 0   | 1      | 1             | 1               | 250       | 9000       | 250,03     | 0    | 1    | 0      | 1,99   |
| 7  | 7            | Polygon | 7  | 4  | 3 | 2  | 1   | 2      | 1             | 1               | 250       | 9000       | 667,58     | 0    | 0,92 | 0      | 23,47  |
| 8  | 8            | Polygon | 8  | 1  | 0 | 0  | 0   | 1      | 1             | 1               | 250       | 9000       | 209,23     | 0    | 0,84 | 0      | 1,33   |
| 9  | 9            | Polygon | 9  | 2  | 0 | 1  | 0   | 1      | 1             | 1               | 250       | 9000       | 300,29     | 0    | 0    | 0      | 0      |
| 10 | 10           | Polygon | 10 | 0  | 0 | 1  | 0   | 2      | 1             | 1               | 250       | 9000       | 285,75     | 0,83 | 0,96 | 2,43   | 5,61   |

115 **Figure S13: Attribute table of the example data table after implementing the risk calculation.** The columns  $PFR_{WB}$  and  $PFR_{MA}$  represent the calculated values for the first 10 rows of the example dataset, created using ArcGIS Pro (ESRI, 2023). The complete dataset and table can be viewed in ArcGIS and the attached excel table file provided in the supplement data.

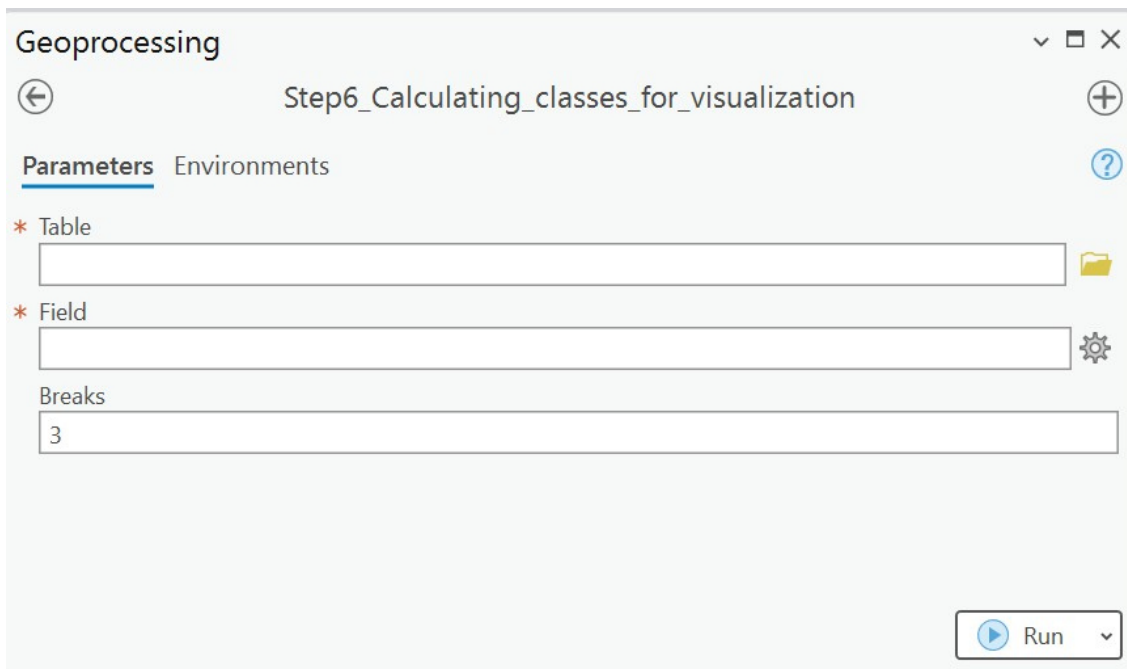

120 **Figure S14: Visualization tool provided within the pluvial flood risk framework.** *Breaks* refers to the classes used for the maps using an iterative mean-based filtering process. Tool created using ArcGIS Pro (ESRI, 2023).

125

## References

Environmental Systems Research Institute (ESRI): ArcGIS Pro (Version 3.2.0), [Software] <https://www.esri.com/en-us/arcgis/products/arcgis-pro/overview>, 2023.

130

Python Software Foundation: Python language reference (Version 3.9.18) [Software]. <https://www.python.org>, 2026.
